# Supplementary material for: Regulation of Arabidopsis thaliana seed dormancy and germination by 12-oxo-phytodienoic acid
Source: PubMed Central journal article supplement (PMC4809285; doi:10.1093/jxb/erw028), 2016-02-11
Supplement: supp_erw028_Supplementary_Figure_S1_S3_Table_S1.pdf [file supp_erw028_Supplementary_Figure_S1_S3_Table_S1.pdf]

Regulation of *Arabidopsis thaliana* seed dormancy and germination by 12-oxo-phytodienoic acid.  
Anuja Dave, Fabián E. Vaistij, Alison D. Gilday, Steven D. Penfield and Ian A. Graham

Supplementary Data

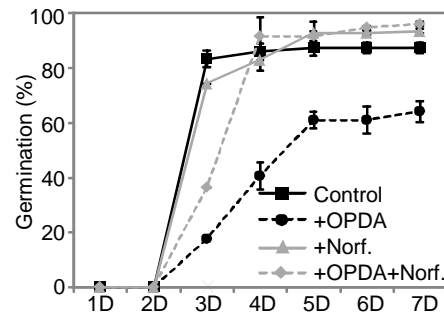

**Supplementary Figure S1.** OPDA requires ABA to inhibit germination: Germination assays of wild-type (Col) after-ripened seeds from 1 to 7 days after imbibition (1D–7D) on water agar (Control) plates and water agar supplemented with 10  $\mu$ M OPDA (+OPDA), 5  $\mu$ M Norflurazon (+Norf.), or both (+OPDA+Norf.).

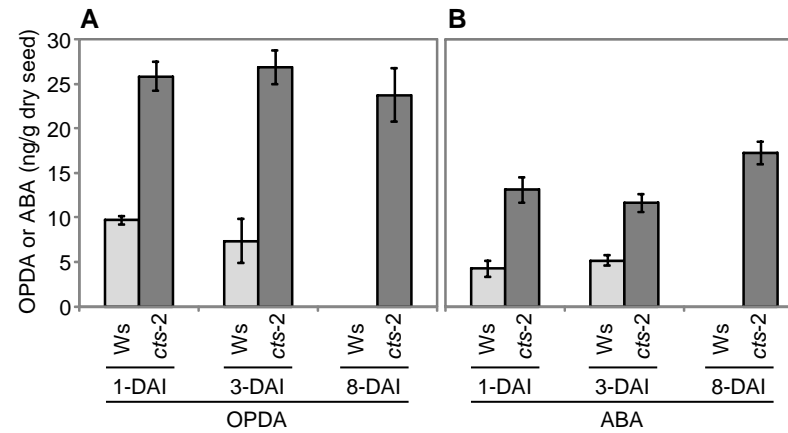

**Supplementary Figure S2.** OPDA and ABA levels are increased in *cts-2* seeds: (A) OPDA and (B) ABA levels in wild-type (Ws) and *cts-2* mutant seeds measured 1, 3 and 8 days after imbibition (DAI) on water agar plates.

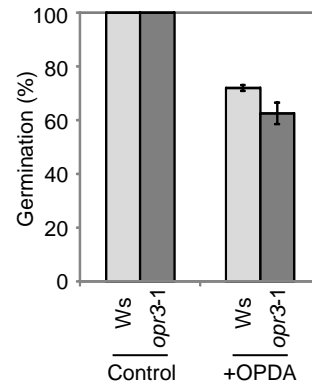

**Supplementary Figure S3.** *opr3-1* seeds are sensitive to OPDA: Germination profiles of after-ripened wild-type (Ws) and *opr3-1* seeds on water agar (Control) plates and water agar supplemented with 10  $\mu$ M OPDA (+OPDA).

Supplementary Table S1

|          |                           |
|----------|---------------------------|
| ACT-For  | TGAGAGATTCAGATGCCAGA      |
| ACT-Rev  | TGGATTCCAGCAGCTCCAT       |
| ABA1-For | ATGGCTTGCAATTATGGCTTC     |
| ABA1-Rev | TCATCGGCTTTGTCAGTGAG      |
| ABI5-For | CAATAAGAGAGGGATAGCGAACGAG |
| ABI5-Rev | CGTCCATTGCTGTCTCCTCCA     |
| RGL2-For | CCGACCCGAATCTGAAACCTTAGTG |
| RGL2-Rev | AAGCGCTTCGTTGAACCTATCGAG  |
| MFT-For  | ATCACTAACGGCTGCGAGAT      |
| MFT-Rev  | CGGGAATATCCACGACAATC      |
| AOS-For  | AAGTCAAAGCCGGTCAAAT       |
| AOS-Rev  | CTTACCGGCGCATTGTTTAT      |

**Supplementary Table S1.** Sequence of primers used for gene expression analyses.
